# Supplementary material for: Biofabrication of Gold Nanoparticles Using Capsicum annuum Extract and Its Antiquorum Sensing and Antibiofilm Activity against Bacterial Pathogens
Source: PubMed Central journal article supplement — ACS Omega. 2021 Jun 16;6(25):16670–82. doi: 10.1021/acsomega.1c02297 (PMC8246701; doi:10.1021/acsomega.1c02297), 2021-06-16
Supplement: ao1c02297_si_001.pdf [file ao1c02297_si_001.pdf]

# **Bio-fabrication of gold nanoparticles using *Capsicum annuum* extract and its antiquorum sensing and antibiofilm activity against bacterial pathogens**

**Faizan Abul Qais <sup>1\*</sup>, Iqbal Ahmad <sup>1</sup>, Mohammad Altaf <sup>2,3</sup>, Saad H. Alotaibi <sup>4</sup>**

<sup>1</sup> *Department of Agricultural Microbiology, Faculty of Agricultural Sciences, Aligarh Muslim University, Aligarh-202002, UP, India.*

<sup>2</sup> *Department of Chemistry, College of Science, King Saud University, Riyadh, 11451, Saudi Arabia.*

<sup>3</sup> *Central Laboratory, College of Science, King Saud University, Riyadh 11451, Saudi Arabia.*

<sup>4</sup> *Department of Chemistry, Turabah University College, Taif University, P. O. Box 11099, Taif 21944, Saudi Arabia.*

\*Corresponding Author

**Dr. Faizan Abul Qais**

Department of Agricultural Microbiology,  
Aligarh Muslim University, Aligarh, UP-202002, India.

Contact Details:

E-mail: [faizanabulqais@gmail.com](mailto:faizanabulqais@gmail.com)

## Supplementary table

**Table S1.** Effect of sub-MICs of GTEF on inhibition of virulence factors of *P. aeruginosa* PAO1 and *S. marcescens* MTCC 97.

| AuNPs-CA concentration | Virulence factors of <i>P. aeruginosa</i> PAO1 |           |                |                   |             |                   |
|------------------------|------------------------------------------------|-----------|----------------|-------------------|-------------|-------------------|
|                        | Pyocyanin <sup>a</sup>                         | Pyoverdin | Total protease | Elastase activity | Rhamnolipid | Swimming motility |
| 25 µg/ml               | 50.28                                          | 16.98     | 33.77          | 17.71             | 10.77       | 6.69              |
| 50 µg/ml               | 63.75                                          | 26.77     | 57.47          | 29.96             | 24.85       | 9.66              |
| 100 µg/ml              | 76.75                                          | 51.59     | 73.04          | 46.66             | 40.08       | 17.84             |
| 200 µg/ml              | 91.94                                          | 72.16     | 81.82          | 65.72             | 46.66       | 46.09             |

  

|           | Virulence factors of <i>S. marcescens</i> MTCC 97 |                   |                             |                   |
|-----------|---------------------------------------------------|-------------------|-----------------------------|-------------------|
|           | Prodigiosin                                       | Protease activity | Cell surface hydrophobicity | Swarming motility |
| 25 µg/ml  | 25.07                                             | 09.69             | 44.83                       | 01.48             |
| 50 µg/ml  | 39.73                                             | 25.81             | 35.53                       | 18.95             |
| 100 µg/ml | 63.59                                             | 41.48             | 21.16                       | 29.36             |
| 200 µg/ml | 78.41                                             | 57.65             | 12.03                       | 72.86             |

All virulence factors are presented as percent inhibition with respect to the control. Cell surface hydrophobicity (CSH) is presented as % CSH

Supplementary figure

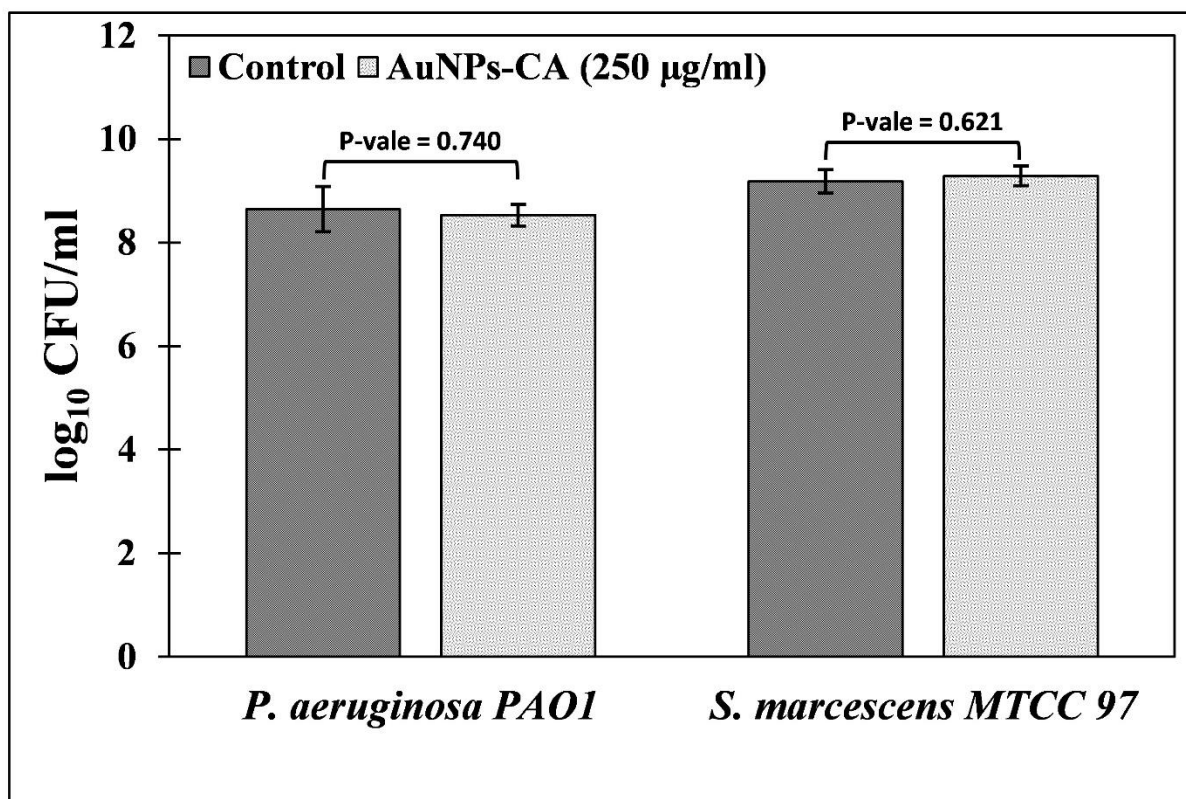

**Figure S1.** Effect of AuNPs-CA (200 µg/ml) on the viability of *P. aeruginosa* PAO1 and *S. marcescens* MTCC 97.
